# Supplementary material for: The MarR family regulator OsbR controls oxidative stress response, anaerobic nitrate respiration, and biofilm formation in Chromobacterium violaceum
Source: PubMed Central journal article supplement (PMC8567585; doi:10.1186/s12866-021-02369-x), 2021-11-04
Supplement: 12866_2021_2369_MOESM1_ESM.pdf [file 12866_2021_2369_MOESM1_ESM.pdf]

# The MarR family regulator OsbR controls oxidative stress response, anaerobic nitrate respiration, and biofilm formation in *Chromobacterium violaceum*

## Additional File 1. Figures S1-S2.

### A

|                                                |                                                                |     |
|------------------------------------------------|----------------------------------------------------------------|-----|
| OsbR                                           | MKKSQASFLPVVRELSRTRYQAFEQFASYNIRRLGLTPPQFDVVTTLGNSQGMNCKELSD   | 60  |
| EEG07003.1 ( <i>P. ferrooxidans</i> )          | -----KTDLVPVIRELVRAFQAFEQYSARHVRELGLTPPQFDVIATLGNTPGMSCKELSE   | 55  |
| KJV29229.1 ( <i>A. magnusonii</i> )            | MPHANKELSLSVIRELARTYQAFEQLSAFHIRQMDLTPPQFDVVATLGNTPGMSCKELSE   | 60  |
| WP_054286986.1 ( <i>G. mobilis</i> )           | -----EAPFLPVVRELARTFQAFEFHSARHVQMGLTPPQFDVIATLGNTPGMSCKQLSE    | 55  |
| TDR78472.1 ( <i>P. purpuratum</i> )            | MSQSPREPFPLPVIRLLAQTYYAFEQFSAFHVRQMGMLTPPQFDVVATLGNTRGMSCKELSE | 60  |
| RXZ44812.1 ( <i>C. cavernae</i> )              | MPTATREPFPLPVIRELVRTYQAFESFSAHVRELGLTPPQFDVIATLGNTPGMSCKELSE   | 60  |
| WP_028497861.1 ( <i>M. aerodenitrificans</i> ) | MTATPAHRFLPVIRELARTYQVFQELSGNHIRELGLTPPQFDVIATLGNTPGMSCKLSE    | 60  |
| RTK97832.1 ( <i>N. bacterium</i> )             | -----FLPVVRELVRSYQAFELVSRHIRELGLTPPQFDIIATLGNTPGMSCKELGE       | 52  |
| WP_147694480.1 ( <i>V. mureinivorans</i> )     | -----IPLVRELVRTYQAFELSSQRIHQHGLTHPQFDVIATLGNTPGMSCKRELS        | 51  |
|                                                | : : * * * : : * * : : . * . * * * : : * * * : * * : * . :      |     |
|                                                |                                                                |     |
| OsbR                                           | HTLITKGTLTGVLDRLEDKGIVTRSMQPNDRRSVFVLTPTYQQQLFNDAFPAHLDYMHNA   | 120 |
| EEG07003.1 ( <i>P. ferrooxidans</i> )          | KTLITKGTLTGVIDRLAEKGVVTRQERPDRRSVFISLTAAGEELFRQVFAHCDYMHQA     | 115 |
| KJV29229.1 ( <i>A. magnusonii</i> )            | KTLITKGTLTGVIDRLIDKGVTRCTLEQDRRSVMVALTAQGEALFQQVFAHIAFMKPA     | 120 |
| WP_054286986.1 ( <i>G. mobilis</i> )           | KTLITKGTLTGVIDRLEEKGLVTRTPLPQDRRSIFIALTAAGEALFQQVFAHILAYMQAA   | 115 |
| TDR78472.1 ( <i>P. purpuratum</i> )            | KTLITKGTLTGVIDRLEKGLVTRTPLPQDRRSIFIALTAAGEALFQQVFAHILAYMQAA    | 120 |
| RXZ44812.1 ( <i>C. cavernae</i> )              | QTLITKGTLTGVIDRLVDKGLVSRTAQEEEDRRSVLIALTDTGQALFDQIFPAHLAHRQA   | 120 |
| WP_028497861.1 ( <i>M. aerodenitrificans</i> ) | KTLITKGTLTGVIDRLIDKGLVSRRIPEEDRRSVFIALTTEGEALFARVFAHLDHMQKL    | 120 |
| RTK97832.1 ( <i>N. bacterium</i> )             | KTLITKGTLTGVLDRLEDKGLICRSTPPEDRRSIFICILTPAGETLFRQAFPAHLQFLDNI  | 112 |
| WP_147694480.1 ( <i>V. mureinivorans</i> )     | RTLITKGTLTGVLDRLEDKGLITRTPVPEHRRSLFVALTPAGEAVFDSAFPDDVVSHCGEA  | 111 |
|                                                | : * * * * * : * * : * * * : : * * * : * * : * * *              |     |
|                                                |                                                                |     |
| OsbR                                           | FQQFGEQDLSGFNDELGRRLRASFSQALEQQENTPA                           | 155 |
| EEG07003.1 ( <i>P. ferrooxidans</i> )          | FSQCSRDLQLWLNQLAGLKTVLNQALEKQEN---                             | 147 |
| KJV29229.1 ( <i>A. magnusonii</i> )            | FDLLEPADMTQLCQQQLARLRAAFNQVLEQKKN---                           | 152 |
| WP_054286986.1 ( <i>G. mobilis</i> )           | FDGFDQTQLDAFQTALTNLRSF-----                                    | 138 |
| TDR78472.1 ( <i>P. purpuratum</i> )            | FTAFDSKDYDLCA TELKRLRDAFTVAMAE-----                            | 149 |
| RXZ44812.1 ( <i>C. cavernae</i> )              | FAGLNDNDFSRITGAEAKLRRSIGLAME-----                              | 148 |
| WP_028497861.1 ( <i>M. aerodenitrificans</i> ) | FDTFSETELEQIQHMLARLRGLDLTA-----                                | 146 |
| RTK97832.1 ( <i>N. bacterium</i> )             | FGRLPPATLDHLQTLQALRQAFQEIK-----                                | 140 |
| WP_147694480.1 ( <i>V. mureinivorans</i> )     | FAHLDASLNQHIAMLAALRAAIGQKLEPAE---                              | 142 |
|                                                | * * * * * :                                                    |     |

### B

|                     |                                                               |               |
|---------------------|---------------------------------------------------------------|---------------|
| OsbR                | -----MKKSQASF--LPVVRELSRTRYQAFEQFASYNIRRLGLTPPQFD             | 42            |
| OspR WP_003114767.1 | MSTRGKVARPDGVEESLLLDNQCIFKLYAASRAVIRG-----YRP-LLEQIGLTPQYL    | 53            |
| BmoR WP_005784476.1 | -----MNTIC-----KMRDIYKALSI FETAFEEVYGISLNEAM                  | 33            |
| MosR WP_003405595.1 | -----MGKGAADFECACYTTRRAARQLGQA-----YDR-ALRPSGLTNTQFS          | 41            |
| AbfR WP_002467790.1 | -----MKQEQMRLANQICFSAYNVSRLFAQF-----YEK-KLKQFGITYSQYL         | 42            |
| MgrA WP_001283444.1 | -----MSDQHNLKEQLCFSLYNAQRQVNRY-----YSNKVPFKYNTLYPPQL          | 42            |
|                     | : . . . . . : . . . . . : : : : * * *                         |               |
|                     |                                                               |               |
| OsbR                | VVTTLGNSQ-----MNC KELS DHTLITKGTLTGVLDRLEDKGIVTRSMQPNDRRSVFVA | 97            |
| OspR WP_003114767.1 | VMLVLWEWHASPEEQPTVKALGRLLDLSGTLTPLLKRLEQLGLVDRRRASHDEREVHLT   | 113           |
| BmoR WP_005784476.1 | VLALRE----AGKETSTAIARTEMAPSHSTSKVIRAVEDKGLIRRALGEVDKRQMYFS    | 89            |
| MosR WP_003405595.1 | TLAVISLSEGSAGIDLTMSELARIGVERTTLTRNLEVMRRDGLV-RVMAGADARCKRIE   | 100           |
| AbfR WP_002467790.1 | VLLTLWEENP-----QTLNSIGRHLDLSNTLTPLPKRLEQSGWVKRERQQSDKRQLIIT   | 97            |
| MgrA WP_001283444.1 | VLTILWDESP-----VNVKVVTELALDTGTVSPLLKRMEQVDLIKRESEVDQREVFIIH   | 97            |
|                     | : : : . . . . . : : : : * * *                                 |               |
|                     |                                                               |               |
| OsbR                | LTPYGGQLFNDAFPAHLDYMHNAFQQFGEQD-----LSGFNDELGRRLRASFSQALEQQEN | 152           |
| OspR WP_003114767.1 | LTVPGITLREVIPLRQQLICSTGFDLNEMF-----DLHQRGLGGLSRFRLVGG---      | 163           |
| BmoR WP_005784476.1 | LTEAGKKRLNELDLK-----VEIP-----EM---LKPLI-----                  | 116           |
| MosR WP_003405595.1 | LTAAGRAALQKAVPLWRGVQAEVTASVGDWPRVRRDIANL-----GQAAEACR-----    | 148           |
| AbfR WP_002467790.1 | LTDNGQQQEQEAVFEAISSCL-PQEFDTTEYDETKYVFEELEQLKHLEK-----        | 146           |
| MgrA WP_001283444.1 | LTDKSETIRPELSNASDKVASASSLSQDEVK-----ELNRLGKVIHAFDETKEK---     | 147           |
|                     | ** . . . . . : : : : : : * * *                                |               |
|                     |                                                               |               |
| OsbR                | TPA                                                           | 155           |
| OspR WP_003114767.1 | ---                                                           | 163           |
| BmoR WP_005784476.1 | ---                                                           | 116           |
| MosR WP_003405595.1 | ---                                                           | 148           |
| AbfR WP_002467790.1 | ---                                                           | 146           |
| MgrA WP_001283444.1 | ---                                                           | 147           |
|                     |                                                               | <b>34.88%</b> |
|                     |                                                               | <b>25.49%</b> |
|                     |                                                               | <b>26.73%</b> |
|                     |                                                               | <b>33.33%</b> |
|                     |                                                               | <b>30.43%</b> |

**Fig. S1 OsbR alignment. a.** Clustal Omega alignment of *C. violaceum* OsbR with highly similar MarR family transcriptional regulators. Proteins of *Pseudogulbenkiania ferrooxidans* (EEG07003.1), *Aquitalea magnusonii* (KJV29229.1), *Gulbenkiania mobilis* (WP\_054286986.1), *Paludibacterium purpuratum* (TDR78472.1), *Crenobacter cavernae* (RXZ44812.1), *Microvirgula aerodenitrificans* (WP\_028497861.1), *Neisseriaceae bacterium* (RTK97832.1), *Vogesella mureinivorans* (WP\_147694480.1) found by BLASTp analysis. High conserved Cys55 and less conserved Cys133 residues are indicated in yellow. Percentages indicate protein identity with OsbR accordingly with NCBI BLAST. **b.** Clustal Omega alignment of OsbR with *Pseudomonas aeruginosa* OspR, *Bacteroides fragilis* BmoR, *Mycobacterium tuberculosis* MosR, *Staphylococcus epidermidis* AbfR, and *Staphylococcus aureus* MgrA. Conserved cysteines are indicated in yellow, as well as both OsbR cysteine residues. Percentages indicate protein identity with OsbR accordingly with NCBI BLAST.

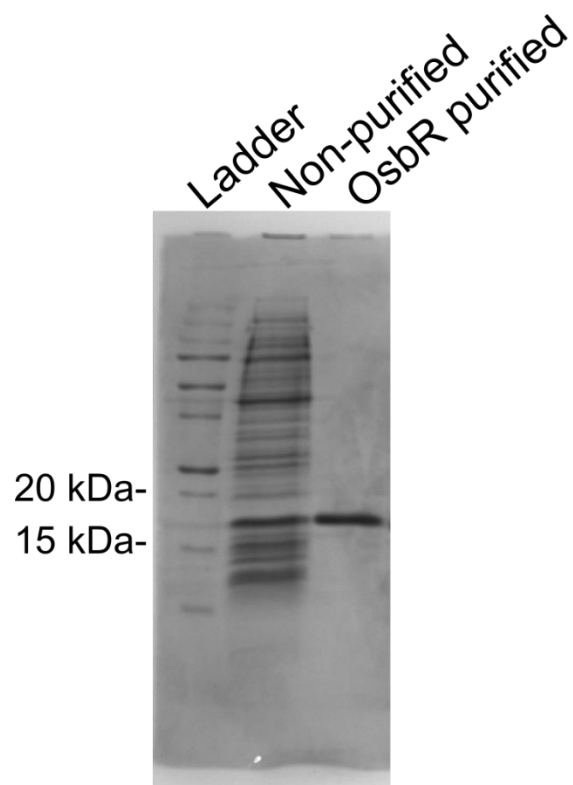

**Fig. S2 His-OsbR purification by affinity chromatography.** The His-OsbR was overexpressed in *E. coli* BL21(DE3) with IPTG (Non-purified). The purification of His-OsbR in a Ni-NTA column presented high efficiency and purity (OsbR purified). His-OsbR has approximately 17 kDa.
