# Supplementary material for: The MarR family regulator OsbR controls oxidative stress response, anaerobic nitrate respiration, and biofilm formation in Chromobacterium violaceum
Source: PubMed Central journal article supplement (PMC8567585; doi:10.1186/s12866-021-02369-x), 2021-11-04
Supplement: 12866_2021_2369_MOESM2_ESM.pdf [file 12866_2021_2369_MOESM2_ESM.pdf]

**The MarR family regulator OsbR controls oxidative stress response, anaerobic nitrate respiration, and biofilm formation in *Chromobacterium violaceum***

**Additional File 3. Figure S3-S5.**

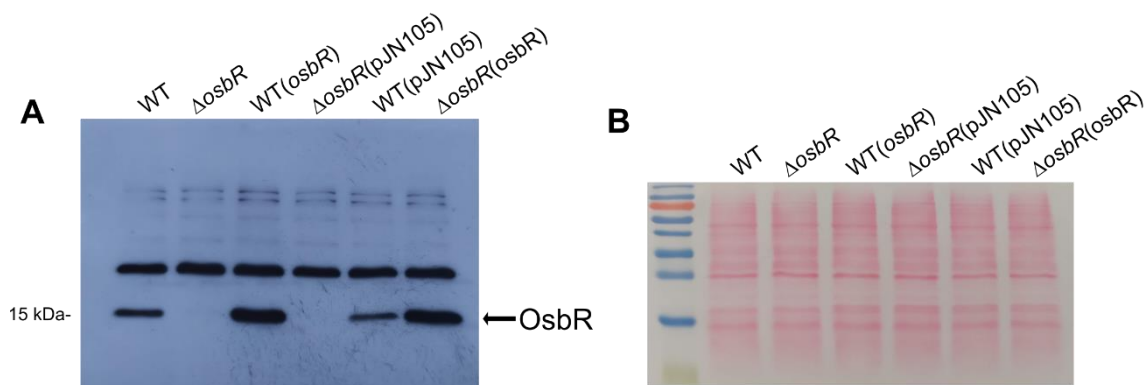

**Fig. S3 Uncropped blot. a, b.** Full-length blot (a) and Ponceau-stained membrane (b) related to the Fig. 1a.

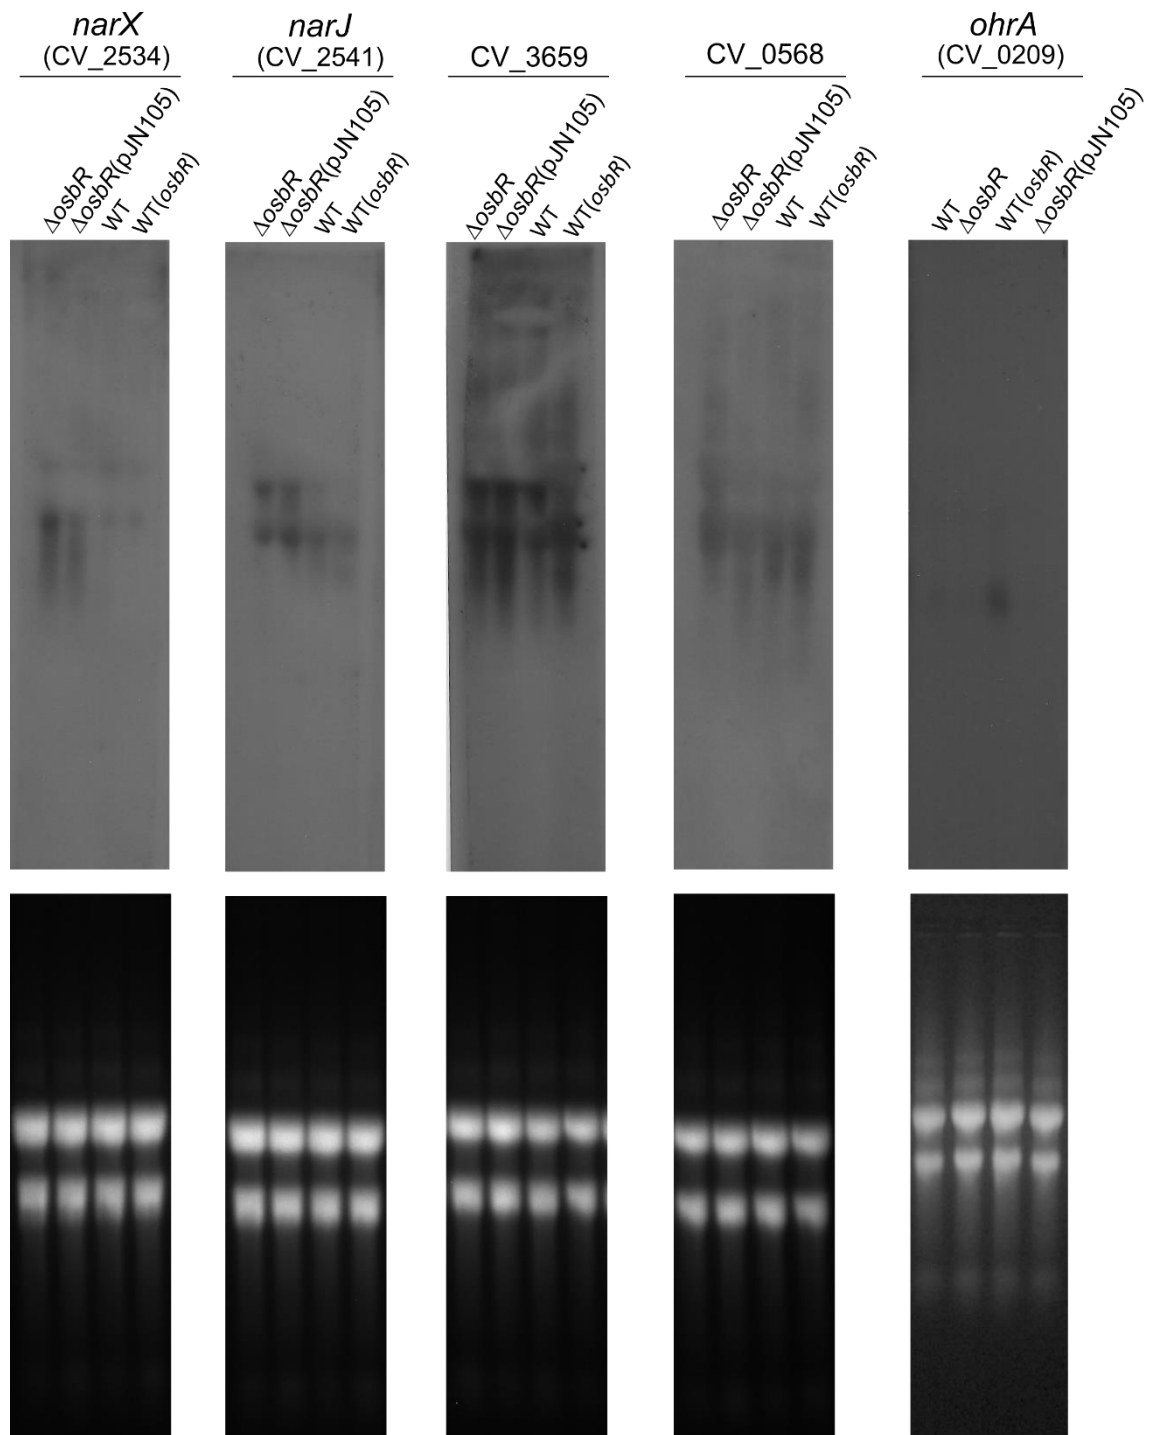

**Fig. S4 Uncropped Northern blot.** Above, autoradiography of the indicated genes.

Below, gel of respective samples showing RNA loading. Related to the Fig. 3.

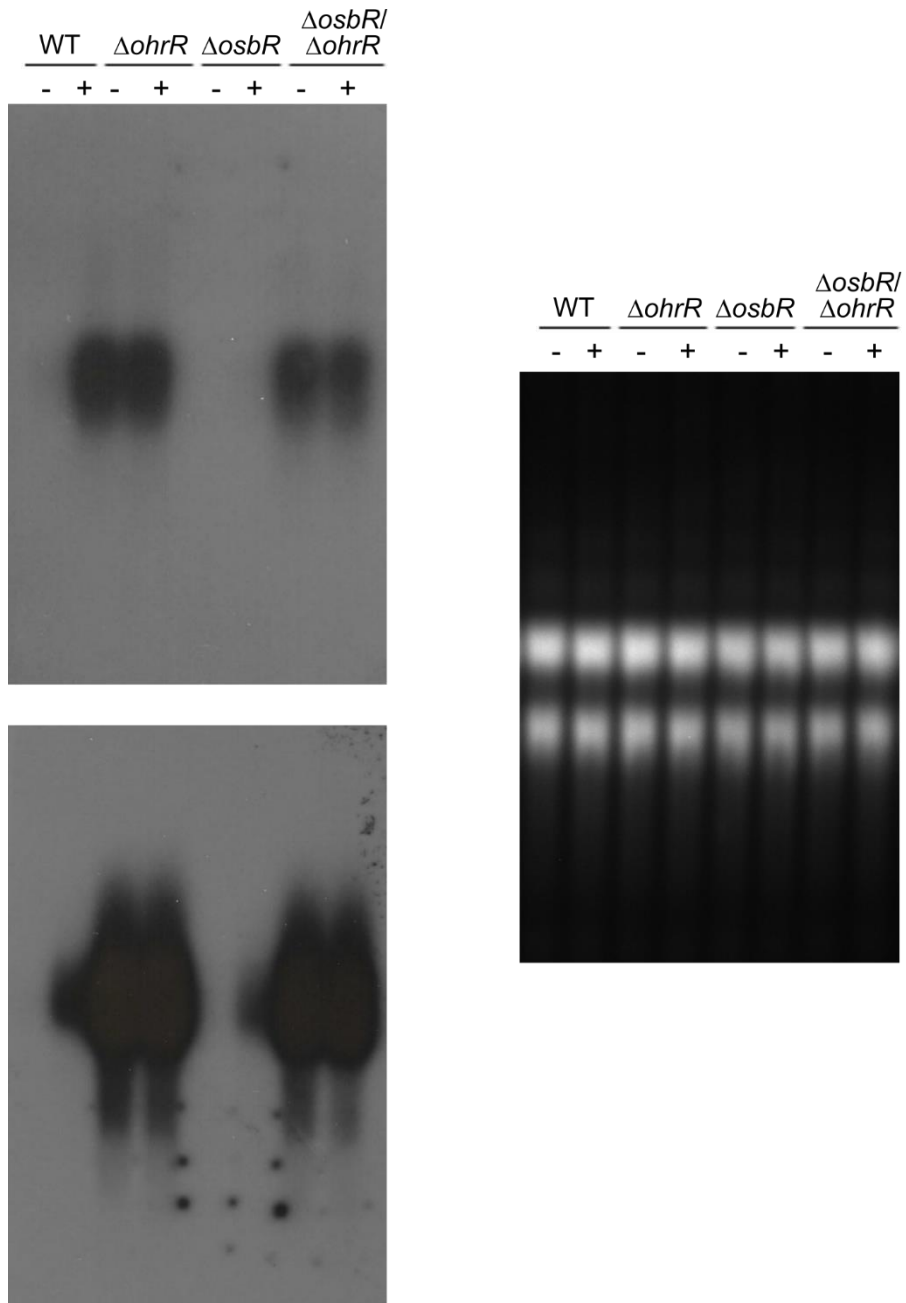

**Fig. S5 Uncropped Northern blot.** Left, autoradiography less (above) or more (below) exposed for *ohrA*. Right, gel of respective samples showing RNA loading. Related to the Fig. 6a.
