# Supplementary material for: The MarR family regulator OsbR controls oxidative stress response, anaerobic nitrate respiration, and biofilm formation in Chromobacterium violaceum
Source: PubMed Central journal article supplement (PMC8567585; doi:10.1186/s12866-021-02369-x), 2021-11-04
Supplement: 12866_2021_2369_MOESM3_ESM.pdf [file 12866_2021_2369_MOESM3_ESM.pdf]

**The MarR family regulator OsbR controls oxidative stress response, anaerobic nitrate respiration, and biofilm formation in *Chromobacterium violaceum***

**Additional File 2. Tables S1, S2 and S3.**

**Table S1** Comparison of the transcriptome profiles of WT with  $\Delta osbR$

| Gene                                                       | Predicted function                                                 | Fold change<br>$\Delta osbR/WT$ | P-value<br>$\Delta osbR/WT$ |
|------------------------------------------------------------|--------------------------------------------------------------------|---------------------------------|-----------------------------|
| <b>Genes downregulated in the <math>\Delta osbR</math></b> |                                                                    |                                 |                             |
| <b>Amino Acid Metabolism</b>                               |                                                                    |                                 |                             |
| CV_0568 *                                                  | Anthranilate synthase                                              | 0.178                           | < 10 <sup>-16</sup>         |
| CV_2803 *                                                  | Probable peptide synthetase protein                                | 0.287                           | < 10 <sup>-16</sup>         |
| CV_2804 *                                                  | Diaminobutyrate-2-oxoglutarate transaminase                        | 0.344                           | < 10 <sup>-16</sup>         |
| CV_3429 *                                                  | Glycine dehydrogenase                                              | 0.438                           | < 10 <sup>-16</sup>         |
| CV_3431 *                                                  | Aminomethyltransferase / glycine cleavage system T protein         | 0.446                           | < 10 <sup>-16</sup>         |
| <b>Fatty Acid Metabolism</b>                               |                                                                    |                                 |                             |
| CV_1541 *                                                  | 3-oxoacyl-[acyl-carrier-protein] synthase II                       | 0.12                            | < 10 <sup>-16</sup>         |
| CV_1546 *                                                  | 3-oxoacyl-[acyl-carrier protein] reductase                         | 0.403                           | < 10 <sup>-16</sup>         |
| <b>Efflux systems/Transport</b>                            |                                                                    |                                 |                             |
| CV_1219 *                                                  | Permease transmembrane protein                                     | 0.381                           | < 10 <sup>-16</sup>         |
| CV_1989                                                    | Probable porin protein                                             | 0.466                           | < 10 <sup>-16</sup>         |
| CV_1629                                                    | Glycine betaine/proline transport system substrate-binding protein | 0.443                           | < 10 <sup>-16</sup>         |
| CV_2248 * <i>fucP</i>                                      | MFS transporter, FHS family, L-fucose permease                     | 0.269                           | < 10 <sup>-16</sup>         |
| <b>Iron Metabolism</b>                                     |                                                                    |                                 |                             |
| CV_1547 *                                                  | Ferredoxin                                                         | 0.379                           | < 10 <sup>-16</sup>         |
| <b>Chemotaxis</b>                                          |                                                                    |                                 |                             |
| CV_3285 *                                                  | Methyl-accepting chemotaxis protein                                | 0.4                             | < 10 <sup>-16</sup>         |
| <b>Metabolic pathways</b>                                  |                                                                    |                                 |                             |
| CV_2247 *                                                  | Transaldolase                                                      | 0.346                           | < 10 <sup>-16</sup>         |
| <b>Signal Transduction</b>                                 |                                                                    |                                 |                             |
| CV_2513                                                    | Probable sensor histidine kinase/response regulator                | 0.486                           | < 10 <sup>-16</sup>         |
| <b>MarR transcriptional Regulator</b>                      |                                                                    |                                 |                             |
| CV_3905 *                                                  | Probable transcriptional regulator/ MarR family                    | 0.021                           | < 10 <sup>-16</sup>         |
| <b>Hypothetical Proteins</b>                               |                                                                    |                                 |                             |
| 67196_2279                                                 | Hypothetical protein                                               | 0.484                           | 6.7 10 <sup>-16</sup>       |
| 67196_4197                                                 | Hypothetical protein                                               | 0.387                           | 3.4 10 <sup>-10</sup>       |
| 67196_4249                                                 | Hypothetical protein                                               | 0.439                           | < 10 <sup>-16</sup>         |
| CV_0071                                                    | Hypothetical protein                                               | 0.343                           | 7.8 10 <sup>-15</sup>       |

|           |                                |       |                      |
|-----------|--------------------------------|-------|----------------------|
| CV_0123   | Hypothetical protein           | 0.359 | < 10 <sup>-16</sup>  |
| CV_0285   | Hypothetical protein           | 0.464 | < 10 <sup>-16</sup>  |
| CV_0512   | Hypothetical protein           | 0.42  | < 10 <sup>-16</sup>  |
| CV_0567 * | Hypothetical protein           | 0.26  | < 10 <sup>-16</sup>  |
| CV_0569 * | Hypothetical protein           | 0.159 | < 10 <sup>-16</sup>  |
| CV_0570 * | Hypothetical protein           | 0.154 | < 10 <sup>-16</sup>  |
| CV_0571 * | Hypothetical protein           | 0.426 | < 10 <sup>-16</sup>  |
| CV_0572 * | Uncharacterized protein        | 0.321 | < 10 <sup>-16</sup>  |
| CV_0592 * | Conserved hypothetical protein | 0.33  | < 10 <sup>-16</sup>  |
| CV_0636   | Hypothetical protein           | 0.459 | < 10 <sup>-16</sup>  |
| CV_1218 * | Hypothetical protein           | 0.302 | 1.7 10 <sup>-8</sup> |
| CV_1527   | Hypothetical protein           | 0.385 | < 10 <sup>-16</sup>  |
| CV_1540 * | Hypothetical protein           | 0.31  | < 10 <sup>-16</sup>  |
| CV_1543 * | Hypothetical protein           | 0.164 | < 10 <sup>-16</sup>  |
| CV_1544 * | Hypothetical protein           | 0.116 | < 10 <sup>-16</sup>  |
| CV_1545 * | Conserved hypothetical protein | 0.209 | < 10 <sup>-16</sup>  |
| CV_2246 * | Hypothetical protein           | 0.32  | < 10 <sup>-16</sup>  |
| CV_2249 * | Hypothetical protein           | 0.291 | < 10 <sup>-16</sup>  |
| CV_2269   | Hypothetical protein           | 0.442 | < 10 <sup>-16</sup>  |
| CV_2807   | Hypothetical protein           | 0.393 | < 10 <sup>-16</sup>  |
| CV_3142 * | Hypothetical protein           | 0.319 | < 10 <sup>-16</sup>  |
| CV_3234   | Conserved hypothetical protein | 0.48  | < 10 <sup>-16</sup>  |
| CV_4224 * | Conserved hypothetical protein | 0.219 | < 10 <sup>-16</sup>  |

### **Genes upregulated in the $\Delta osbR$**

| <b>Transmembrane Transport</b> |              |                                                                             |       |                       |
|--------------------------------|--------------|-----------------------------------------------------------------------------|-------|-----------------------|
| CV_1800                        |              | Probable permease                                                           | 2.227 | 7.5 10 <sup>-10</sup> |
| <b>Metabolic Pathways</b>      |              |                                                                             |       |                       |
| CV_2532 *                      | <i>moaA2</i> | Molybdenum cofactor biosynthesis protein                                    | 2.362 | < 10 <sup>-16</sup>   |
| <b>Nitrogen metabolism</b>     |              |                                                                             |       |                       |
| CV_2534 *                      | <i>narX</i>  | Transmembrane nitrate/nitrite sensor kinase transcription regulator protein | 2.494 | < 10 <sup>-16</sup>   |
| CV_2540 *                      | <i>narI</i>  | Nitrate reductase gamma subunit                                             | 5.439 | < 10 <sup>-16</sup>   |
| CV_2541 *                      | <i>narJ</i>  | Nitrate reductase delta subunit                                             | 4.73  | < 10 <sup>-16</sup>   |
| CV_2542 *                      | <i>narH</i>  | Nitrate reductase / nitrite oxidoreductase, beta subunit                    | 4.823 | < 10 <sup>-16</sup>   |
| CV_2543 *                      | <i>narG</i>  | Respiratory nitrate reductase alpha chain                                   | 4.973 | < 10 <sup>-16</sup>   |
| CV_2544 *                      | <i>narK2</i> | Nitrite extrusion protein                                                   | 6.301 | < 10 <sup>-16</sup>   |
| CV_2545 *                      | <i>narK1</i> | Nitrite extrusion protein                                                   | 4.952 | < 10 <sup>-16</sup>   |
| <b>RNA binding protein</b>     |              |                                                                             |       |                       |
| CV_3799                        |              | RNA-binding protein/ conserved hypothetical protein                         | 2.531 | < 10 <sup>-16</sup>   |
| <b>Efflux systems</b>          |              |                                                                             |       |                       |
| CV_0993                        |              | MFS transporter, AAHS family, 4-hydroxybenzoate transporter                 | 3.041 | < 10 <sup>-16</sup>   |

| CV_2845               | Probable efflux transporter    | 2.273 | < 10 <sup>-16</sup>   |
|-----------------------|--------------------------------|-------|-----------------------|
| Hypothetical Proteins |                                |       |                       |
| CV_1337               | Hypothetical protein           | 2.577 | < 10 <sup>-16</sup>   |
| CV_1521               | Probable two-component sensor  | 2.534 | < 10 <sup>-16</sup>   |
| CV_1639               | Conserved hypothetical protein | 3.54  | < 10 <sup>-16</sup>   |
| CV_1848               | Conserved hypothetical protein | 2.531 | 1.6 10 <sup>-14</sup> |
| CV_2107               | Hypothetical protein           | 4.749 | < 10 <sup>-16</sup>   |
| CV_2109               | Conserved hypothetical protein | 2.486 | < 10 <sup>-16</sup>   |
| CV_2166               | Conserved hypothetical protein | 2.462 | 3.4 10 <sup>-15</sup> |
| CV_3601               | Hypothetical protein           | 2.82  | < 10 <sup>-16</sup>   |
| CV_4399               | Hypothetical protein           | 2.557 | 1.5 10 <sup>-8</sup>  |

\*Genes shared between our both microarrays

**Table S2** Comparison of the transcriptome profiles of WT(*osbR*) versus  $\Delta$ *osbR*(pJN105)

| Open reading frame                                       | Gene        | Predicted function                              | Fold change $\Delta$ <i>osbR</i> (pJN105)/WT( <i>osbR</i> ) | P-value $\Delta$ <i>osbR</i> (pJN105)/WT( <i>osbR</i> ) |
|----------------------------------------------------------|-------------|-------------------------------------------------|-------------------------------------------------------------|---------------------------------------------------------|
| Genes downregulated in the $\Delta$ <i>osbR</i> (pJN105) |             |                                                 |                                                             |                                                         |
| Oxidative Stress                                         |             |                                                 |                                                             |                                                         |
| CV_0209                                                  | <i>ohrA</i> | organic hydroperoxide resistance protein        | 0.17                                                        | < 10 <sup>-16</sup>                                     |
| CV_0210                                                  | <i>ohrR</i> | Probable transcriptional regulator, MarR family | 0.35                                                        | < 10 <sup>-16</sup>                                     |
| Nitrogen Metabolism                                      |             |                                                 |                                                             |                                                         |
| CV_4002                                                  | <i>glnK</i> | Nitrogen regulatory protein P-II-2              | 0.27                                                        | < 10 <sup>-16</sup>                                     |
| CV_4003                                                  | <i>amtB</i> | Ammonium transporter                            | 0.45                                                        | < 10 <sup>-16</sup>                                     |
| Virulence                                                |             |                                                 |                                                             |                                                         |
| CV_3143                                                  |             | Probable mannose-binding lectin precursor       | 0.22                                                        | < 10 <sup>-16</sup>                                     |
| Efflux Systems                                           |             |                                                 |                                                             |                                                         |
| CV_1219 *                                                |             | Probable permease transmembrane protein         | 0.05                                                        | < 10 <sup>-16</sup>                                     |
| CV_2248 *                                                | <i>fucP</i> | Fucose permease                                 | 0.07                                                        | < 10 <sup>-16</sup>                                     |
| CV_4370                                                  | <i>aroP</i> | Aromatic amino acid transport protein           | 0.24                                                        | < 10 <sup>-16</sup>                                     |
| Transcriptional Regulators                               |             |                                                 |                                                             |                                                         |
| CV_2087                                                  |             | Probable transcriptional regulator, MerR family | 0.13                                                        | < 10 <sup>-16</sup>                                     |
| CV_4290                                                  |             | Probable transcriptional regulator LysR-family  | 0.42                                                        | < 10 <sup>-16</sup>                                     |
| Chemotaxis                                               |             |                                                 |                                                             |                                                         |
| CV_3285 *                                                |             | Methyl-accepting chemotaxis protein             | 0.37                                                        | < 10 <sup>-16</sup>                                     |
| Fatty Acid Metabolism                                    |             |                                                 |                                                             |                                                         |
| CV_1541 *                                                |             | 3-oxoacyl-[acyl-carrier-protein] synthase II    | 0.09                                                        | < 10 <sup>-16</sup>                                     |

|                                       |                    |                                                 |      |                     |
|---------------------------------------|--------------------|-------------------------------------------------|------|---------------------|
| CV_1546 *                             |                    | 3-oxoacyl-[acyl-carrier protein] reductase      | 0.23 | < 10 <sup>-16</sup> |
| <b>Amino Acid Metabolism</b>          |                    |                                                 |      |                     |
| CV_0568 *                             |                    | Anthranilate synthase                           | 0.08 | < 10 <sup>-16</sup> |
| CV_1762                               |                    | 3-methylcrotonyl-CoA carboxylase alpha subunit  | 0.36 | < 10 <sup>-16</sup> |
| CV_1763                               |                    | Methylglutaconyl-CoA hydratase                  | 0.36 | < 10 <sup>-16</sup> |
| CV_1764                               |                    | 3-methylcrotonyl-CoA carboxylase beta subunit   | 0.33 | < 10 <sup>-16</sup> |
| CV_1766                               |                    | isovaleryl-CoA dehydrogenase                    | 0.16 | < 10 <sup>-16</sup> |
| CV_2085                               | <i>mmsA1</i>       | Methylmalonate-semialdehyde dehydrogenase       | 0.29 | < 10 <sup>-16</sup> |
| CV_2088                               | <i>atoB</i>        | Acetyl-CoA C-acetyltransferase                  | 0.31 | < 10 <sup>-16</sup> |
| CV_2802                               |                    | Probable peptide synthetase protein             | 0.22 | < 10 <sup>-16</sup> |
| CV_2803 *                             |                    | Probable peptide synthetase protein             | 0.08 | < 10 <sup>-16</sup> |
| CV_2804 *                             |                    | Probable diaminobutyrate-pyruvate transaminase  | 0.08 | < 10 <sup>-16</sup> |
| CV_3429 *                             | <i>gcvP</i>        | Glycine cleavage system P protein               | 0.42 | < 10 <sup>-16</sup> |
| CV_3430                               | <i>gcvH</i>        | Glycine cleavage system H protein               | 0.31 | < 10 <sup>-16</sup> |
| CV_3431 *                             | <i>gcvT</i>        | Glycine cleavage system T protein               | 0.24 | < 10 <sup>-16</sup> |
| <b>Metabolic pathways</b>             |                    |                                                 |      |                     |
| CV_0190                               |                    | Glyceraldehyde 3-phosphate dehydrogenase        | 0.42 | < 10 <sup>-16</sup> |
| CV_1222                               |                    | Probable aldehyde dehydrogenase                 | 0.47 | < 10 <sup>-16</sup> |
| CV_2086                               |                    | 3-hydroxybutyryl-CoA dehydrogenase              | 0.17 | < 10 <sup>-16</sup> |
| CV_2247 *                             |                    | Transaldolase                                   | 0.08 | < 10 <sup>-16</sup> |
| CV_4289                               | <i>proA</i>        | Glutamate-5-semialdehyde dehydrogenase          | 0.22 | < 10 <sup>-16</sup> |
| <b>Iron Metabolism</b>                |                    |                                                 |      |                     |
| CV_0398                               | <i>exbD2</i>       | Biopolymer transport exbD transmembrane protein | 0.40 | < 10 <sup>-16</sup> |
| CV_0399                               |                    | Probable exbB-like biopolymer transport         | 0.40 | < 10 <sup>-16</sup> |
| CV_0400                               |                    | Periplasmic protein TonB                        | 0.37 | < 10 <sup>-16</sup> |
| CV_1481                               | <i>aroF</i>        | 2-dehydro-3-deoxy-phosphoheptonate aldolase     | 0.41 | < 10 <sup>-16</sup> |
| CV_1482                               | <i>cbaA (entA)</i> | 2,3-dihydro-2,3-dihydroxybenzoate dehydrogenase | 0.39 | < 10 <sup>-16</sup> |
| CV_1483                               | <i>cbaB (entB)</i> | Isochorismatase                                 | 0.47 | < 10 <sup>-16</sup> |
| CV_1484                               | <i>cbaE (entE)</i> | 2,3-dihydroxybenzoate-AMP ligase                | 0.38 | < 10 <sup>-16</sup> |
| CV_1485                               | <i>cbaC (entC)</i> | Isochorismate synthase EntC / MenF              | 0.39 | < 10 <sup>-16</sup> |
| CV_1486                               | <i>cbaF (entF)</i> | Enterobactin synthetase component F             | 0.42 | < 10 <sup>-16</sup> |
| CV_1547 *                             | <i>fdxA2</i>       | ferredoxin                                      | 0.21 | < 10 <sup>-16</sup> |
| <b>MarR transcriptional Regulator</b> |                    |                                                 |      |                     |
| CV_3905 *                             |                    | Probable transcriptional regulator/ MarR family | 0.01 | < 10 <sup>-16</sup> |
| <b>Hypothetical Proteins</b>          |                    |                                                 |      |                     |
| 67196_3489                            |                    | Hypothetical protein                            | 0.07 | < 10 <sup>-16</sup> |

|            |                                |      |                       |
|------------|--------------------------------|------|-----------------------|
| 67196_3491 | Hypothetical protein           | 0.07 | < 10 <sup>-16</sup>   |
| CV_0247    | Hypothetical protein           | 0.33 | < 10 <sup>-16</sup>   |
| CV_0567 *  | Hypothetical protein           | 0.11 | < 10 <sup>-16</sup>   |
| CV_0569 *  | Hypothetical protein           | 0.08 | < 10 <sup>-16</sup>   |
| CV_0570 *  | Hypothetical protein           | 0.09 | < 10 <sup>-16</sup>   |
| CV_0571 *  | Hypothetical protein           | 0.37 | < 10 <sup>-16</sup>   |
| CV_0572 *  | Hypothetical protein           | 0.11 | < 10 <sup>-16</sup>   |
| CV_0592 *  | Conserved hypothetical protein | 0.14 | < 10 <sup>-16</sup>   |
| CV_1218 *  | Hypothetical protein           | 0.29 | 1.1 10 <sup>-9</sup>  |
| CV_1220    | Hypothetical protein           | 0.16 | < 10 <sup>-16</sup>   |
| CV_1221    | Hypothetical protein           | 0.34 | < 10 <sup>-16</sup>   |
| CV_1223    | Hypothetical protein           | 0.39 | < 10 <sup>-16</sup>   |
| CV_1244    | Conserved hypothetical protein | 0.45 | 1.2 10 <sup>-11</sup> |
| CV_1475    | Hypothetical protein           | 0.36 | < 10 <sup>-16</sup>   |
| CV_1540 *  | Hypothetical protein           | 0.31 | < 10 <sup>-16</sup>   |
| CV_1542    | Hypothetical protein           | 0.12 | < 10 <sup>-16</sup>   |
| CV_1543 *  | Hypothetical protein           | 0.13 | < 10 <sup>-16</sup>   |
| CV_1544 *  | Hypothetical protein           | 0.06 | < 10 <sup>-16</sup>   |
| CV_1545 *  | Conserved hypothetical protein | 0.07 | < 10 <sup>-16</sup>   |
| CV_1548    | Conserved hypothetical protein | 0.41 | < 10 <sup>-16</sup>   |
| CV_1765    | Conserved hypothetical protein | 0.25 | < 10 <sup>-16</sup>   |
| CV_2246 *  | Hypothetical protein           | 0.08 | < 10 <sup>-16</sup>   |
| CV_2249 *  | Hypothetical protein           | 0.05 | < 10 <sup>-16</sup>   |
| CV_2970    | Conserved hypothetical protein | 0.34 | < 10 <sup>-16</sup>   |
| CV_3142 *  | Hypothetical protein           | 0.35 | < 10 <sup>-16</sup>   |
| CV_3159    | Conserved hypothetical protein | 0.31 | < 10 <sup>-16</sup>   |
| CV_3565    | Hypothetical protein           | 0.16 | < 10 <sup>-16</sup>   |
| CV_3566    | Hypothetical protein           | 0.05 | < 10 <sup>-16</sup>   |
| CV_4224 *  | Conserved hypothetical protein | 0.11 | < 10 <sup>-16</sup>   |

### Genes upregulated in the $\Delta osbR$ (pJN105)

| Nitrogen Metabolism |              |                                                                             |       |                     |
|---------------------|--------------|-----------------------------------------------------------------------------|-------|---------------------|
| CV_1411             |              | Nitrite transporter NirC                                                    | 19.13 | < 10 <sup>-16</sup> |
| CV_2188             | <i>pphA</i>  | Phosphoprotein phosphatase                                                  | 9.96  | < 10 <sup>-16</sup> |
| CV_2534 *           | <i>narX</i>  | Transmembrane nitrate/nitrite sensor kinase transcription regulator protein | 16.12 | < 10 <sup>-16</sup> |
| CV_2535             | <i>narL</i>  | Nitrate/nitrite response regulator protein narL                             | 11.10 | < 10 <sup>-16</sup> |
| CV_2540 *           | <i>narI</i>  | Nitrate reductase                                                           | 47.56 | < 10 <sup>-16</sup> |
| CV_2541 *           | <i>narJ</i>  | Nitrate reductase                                                           | 42.05 | < 10 <sup>-16</sup> |
| CV_2542 *           | <i>narH</i>  | Nitrate reductase                                                           | 30.23 | < 10 <sup>-16</sup> |
| CV_2543 *           | <i>narG</i>  | Respiratory nitrate reductase alpha chain                                   | 21.89 | < 10 <sup>-16</sup> |
| CV_2544 *           | <i>narK2</i> | Nitrite extrusion protein                                                   | 52.67 | < 10 <sup>-16</sup> |

|                                   |              |                                                                                       |       |                     |
|-----------------------------------|--------------|---------------------------------------------------------------------------------------|-------|---------------------|
| CV_2545 *                         | <i>narK1</i> | Nitrite extrusion protein                                                             | 19.53 | < 10 <sup>-16</sup> |
| <b>Aerobic Respiration</b>        |              |                                                                                       |       |                     |
| CV_1174                           |              | Probable cytochrome-c oxidase, subunit I                                              | 2.23  | < 10 <sup>-16</sup> |
| CV_2449                           |              | Probable coenzyme F390 synthetase                                                     | 5.75  | < 10 <sup>-16</sup> |
| CV_3657                           | <i>cioB</i>  | Cytochrome bd-I oxidase subunit II                                                    | 6.95  | < 10 <sup>-16</sup> |
| CV_3658                           | <i>cioA</i>  | Cytochrome d ubiquinol oxidase subunit I                                              | 5.17  | < 10 <sup>-16</sup> |
| <b>Virulence</b>                  |              |                                                                                       |       |                     |
| CV_0304                           | <i>rarD</i>  | Chloramphenicol-sensitive protein                                                     | 5.53  | < 10 <sup>-16</sup> |
| CV_0513                           | <i>hlyB</i>  | Hemolysin B                                                                           | 2.61  | < 10 <sup>-16</sup> |
| CV_0516                           |              | Probable calcium binding hemolysin                                                    | 3.05  | < 10 <sup>-16</sup> |
| CV_2419                           |              | Probable oxygen-regulated invasion protein;<br>cell invasion protein                  | 3.05  | < 10 <sup>-16</sup> |
| CV_2422                           |              | Probable peptidyl-dipeptidase<br>Dcp/(GenBank) cell invasion protein -<br>cytoplasmic | 2.93  | < 10 <sup>-16</sup> |
| CV_2423                           | <i>prgH</i>  | Pathogenicity 1 island effector protein                                               | 2.80  | < 10 <sup>-16</sup> |
| <b>Efflux systems</b>             |              |                                                                                       |       |                     |
| CV_0771                           |              | MFS transporter, DHA1 family,<br>bicyclomycin/chloramphenicol resistance<br>protein   | 7.45  | < 10 <sup>-16</sup> |
| CV_1105                           | <i>gltS</i>  | Sodium/glutamate symport carrier protein                                              | 3.99  | < 10 <sup>-16</sup> |
| CV_1409                           | <i>sdaC</i>  | Serine transporter                                                                    | 4.94  | < 10 <sup>-16</sup> |
| CV_1726                           |              | Inner membrane transporter RhtA                                                       | 3.77  | < 10 <sup>-16</sup> |
| CV_1734                           |              | Outer membrane protein, adhesin transport<br>system                                   | 7.29  | < 10 <sup>-16</sup> |
| CV_1735                           | <i>cydC</i>  | ATP-binding/permease fusion ABC<br>transporter                                        | 6.86  | < 10 <sup>-16</sup> |
| CV_1736                           | <i>hylD</i>  | Membrane fusion protein, adhesin transport<br>system                                  | 4.36  | < 10 <sup>-16</sup> |
| CV_1737                           |              | Conserved hypothetical protein                                                        | 2.99  | < 10 <sup>-16</sup> |
| CV_1901                           |              | Probable transport protein                                                            | 3.29  | < 10 <sup>-16</sup> |
| CV_3677                           |              | Cobalt-zinc-cadmium efflux system protein                                             | 2.36  | < 10 <sup>-16</sup> |
| <b>Transcriptional Regulators</b> |              |                                                                                       |       |                     |
| CV_0294                           | <i>sir2</i>  | Transcriptional regulator                                                             | 2.45  | < 10 <sup>-16</sup> |
| CV_1451                           |              | Probable transcriptional regulator                                                    | 3.59  | < 10 <sup>-16</sup> |
| CV_1664                           |              | Two-component system, LytT family,<br>response regulator                              | 10.65 | < 10 <sup>-16</sup> |
| CV_1665                           |              | Probable two-component system sensor<br>kinase                                        | 5.06  | < 10 <sup>-16</sup> |
| CV_1905                           |              | Probable transcription regulator                                                      | 5.02  | < 10 <sup>-16</sup> |
| CV_3659                           |              | Probable transcriptional regulator marR<br>family                                     | 4.27  | < 10 <sup>-16</sup> |
| <b>Chemotaxis</b>                 |              |                                                                                       |       |                     |
| CV_1698                           |              | Methyl-accepting chemotaxis protein                                                   | 3.12  | < 10 <sup>-16</sup> |
| CV_4244                           |              | Probable methyl-accepting chemotaxis<br>transducer                                    | 2.74  | < 10 <sup>-16</sup> |

**Amino Acid Metabolism**

|         |              |                                                                |      |                     |
|---------|--------------|----------------------------------------------------------------|------|---------------------|
| CV_0118 | <i>gltK</i>  | Glutamate/aspartate transport system permease protein          | 3.59 | < 10 <sup>-16</sup> |
| CV_0119 | <i>gltJ</i>  | Glutamate/aspartate transport system permease                  | 4.18 | < 10 <sup>-16</sup> |
| CV_0120 |              | Glutamate/aspartate transport system substrate-binding protein | 3.63 | < 10 <sup>-16</sup> |
| CV_1408 | <i>sdaA2</i> | L-serine dehydratase                                           | 3.58 | < 10 <sup>-16</sup> |
| CV_1914 | <i>dadA2</i> | D-amino acid dehydrogenase                                     | 4.37 | < 10 <sup>-16</sup> |
| CV_1915 | <i>alr</i>   | Alanine racemase                                               | 5.07 | < 10 <sup>-16</sup> |
| CV_1934 | <i>metY</i>  | O-acetylhomoserine (thiol)-lyase                               | 2.84 | < 10 <sup>-16</sup> |
| CV_2223 |              | Probable sodium/alanine symporter                              | 3.86 | < 10 <sup>-16</sup> |
| CV_2382 | <i>tyrB1</i> | Aromatic-amino-acid transaminase                               | 2.81 | < 10 <sup>-16</sup> |
| CV_3381 | <i>dcp2</i>  | Probable peptidyl-dipeptidase Dcp                              | 2.96 | < 10 <sup>-16</sup> |
| CV_3678 | <i>nadA</i>  | Quinolinate synthetase                                         | 2.40 | < 10 <sup>-16</sup> |
| CV_4084 |              | Putative protease                                              | 3.63 | < 10 <sup>-16</sup> |

**Metabolic Pathways**

|           |              |                                                         |       |                     |
|-----------|--------------|---------------------------------------------------------|-------|---------------------|
| CV_0145   | <i>zwf</i>   | Glucose-6-phosphate 1-dehydrogenase                     | 2.78  | < 10 <sup>-16</sup> |
| CV_0515   |              | Probable glycosyltransferase                            | 4.75  | < 10 <sup>-16</sup> |
| CV_0979   | <i>ptsG</i>  | Protein-N p-phosphohistidine-sugar phosphotransferase   | 3.96  | < 10 <sup>-16</sup> |
| CV_0980   |              | Probable phosphoenolpyruvate-protein phosphotransferase | 4.29  | < 10 <sup>-16</sup> |
| CV_1137   | <i>adhE</i>  | Acetaldehyde dehydrogenase                              | 2.87  | < 10 <sup>-16</sup> |
| CV_1528   |              | Probable synthetase/amidase                             | 2.65  | < 10 <sup>-16</sup> |
| CV_1653   | <i>hemG</i>  | Protoporphyrinogen oxidase                              | 3.28  | < 10 <sup>-16</sup> |
| CV_1662   | <i>cstA1</i> | Carbon starvation protein                               | 34.40 | < 10 <sup>-16</sup> |
| CV_1902   |              | Probable hydrolase                                      | 2.42  | < 10 <sup>-16</sup> |
| CV_2446   |              | 3-oxoacyl-[acyl-carrier-protein] synthase III           | 5.10  | < 10 <sup>-16</sup> |
| CV_2447   |              | Probable dehydrogenase                                  | 5.64  | < 10 <sup>-16</sup> |
| CV_2532 * | <i>moaA2</i> | Molybdenum cofactor biosynthesis protein A              | 17.23 | < 10 <sup>-16</sup> |
| CV_2656   |              | Probable cytochrome P450 hydroxylase                    | 2.31  | < 10 <sup>-16</sup> |
| CV_2697   |              | Probable tldD protein family                            | 3.69  | < 10 <sup>-16</sup> |
| CV_3026   | <i>lldP</i>  | L-lactate permease                                      | 3.48  | < 10 <sup>-16</sup> |
| CV_3027   |              | Linoleoyl-CoA desaturase/ probable ferredoxin           | 2.48  | < 10 <sup>-16</sup> |
| CV_3054   | <i>fruA</i>  | Protein-N p-phosphohistidine-sugar phosphotransferase   | 3.22  | < 10 <sup>-16</sup> |
| CV_3298   | <i>lamB</i>  | Maltoporin precursor                                    | 9.61  | < 10 <sup>-16</sup> |
| CV_3299   | <i>treC</i>  | Trehalose-6-phosphate hydrolase                         | 10.59 | < 10 <sup>-16</sup> |
| CV_3300   | <i>treB</i>  | Protein-N p-phosphohistidine-sugar phosphotransferase   | 10.78 | < 10 <sup>-16</sup> |
| CV_3304   | <i>aceB</i>  | Malate synthase A                                       | 5.24  | < 10 <sup>-16</sup> |
| CV_3736   |              | Putative acetyltransferase                              | 2.34  | < 10 <sup>-16</sup> |

**Secondary metabolites production**

|                              |             |                                                              |      |                     |
|------------------------------|-------------|--------------------------------------------------------------|------|---------------------|
| CV_1682                      | <i>hcnC</i> | Hydrogen cyanide synthase HcnC                               | 5.86 | < 10 <sup>-16</sup> |
| CV_1683                      | <i>hcnB</i> | Hydrogen cyanide synthase HcnB                               | 5.43 | < 10 <sup>-16</sup> |
| CV_1684                      | <i>hcnA</i> | Hydrogen cyanide synthase HcnA                               | 4.59 | < 10 <sup>-16</sup> |
| <b>Sulfur metabolism</b>     |             |                                                              |      |                     |
| CV_1828                      | <i>cysA</i> | Sulfate transport system ATP-binding protein                 | 2.41 | < 10 <sup>-16</sup> |
| CV_1829                      | <i>cysW</i> | Sulfate transport system permease protein CysW               | 2.82 | < 10 <sup>-16</sup> |
| CV_1830                      | <i>cysU</i> | Sulfate transport system permease protein                    | 2.79 | < 10 <sup>-16</sup> |
| CV_1832                      | <i>sbp</i>  | Sulfate transport system sulfate-binding protein             | 5.84 | < 10 <sup>-16</sup> |
| CV_1904                      |             | O-acetylserine/cysteine efflux transporter                   | 7.35 | < 10 <sup>-16</sup> |
| CV_2855                      | <i>tauD</i> | Taurine dioxygenase                                          | 5.37 | < 10 <sup>-16</sup> |
| CV_2856                      | <i>tauC</i> | Taurine transport system permease protein                    | 9.77 | < 10 <sup>-16</sup> |
| CV_2857                      | <i>tauB</i> | Taurine ATP-binding component of a transport system          | 9.15 | < 10 <sup>-16</sup> |
| CV_2858                      | <i>tauA</i> | Taurine transport system substrate-binding protein           | 6.59 | < 10 <sup>-16</sup> |
| CV_2981                      |             | Cystine transport system ATP-binding protein                 | 2.30 | < 10 <sup>-16</sup> |
| CV_2982                      |             | Cystine transport system permease protein                    | 2.54 | < 10 <sup>-16</sup> |
| CV_2983                      |             | Cystine transport system substrate-binding protein           | 2.42 | < 10 <sup>-16</sup> |
| <b>Fatty acid metabolism</b> |             |                                                              |      |                     |
| 67196_2381                   |             | C-5 sterol desaturase                                        | 6.13 | < 10 <sup>-16</sup> |
| CV_2452                      |             | Linoleoyl-CoA desaturase                                     | 2.49 | < 10 <sup>-16</sup> |
| CV_4378                      |             | Probable phosphatidylethanolamine N-methyltransferase        | 4.62 | < 10 <sup>-16</sup> |
| <b>Iron metabolism</b>       |             |                                                              |      |                     |
| CV_0895                      | <i>oprC</i> | Iron complex outermembrane receptor protein                  | 3.34 | < 10 <sup>-16</sup> |
| CV_1452                      |             | Probable iron-sulfur 4Fe-4S ferredoxin transmembrane protein | 4.24 | < 10 <sup>-16</sup> |
| CV_1699                      |             | Probable tonB-dependent receptor                             | 7.89 | < 10 <sup>-16</sup> |
| CV_3553                      | <i>feoB</i> | Ferrous iron transport protein B                             | 5.05 | < 10 <sup>-16</sup> |
| <b>Hypothetical Proteins</b> |             |                                                              |      |                     |
| CV_0333                      |             | Conserved hypothetical protein                               | 6.21 | < 10 <sup>-16</sup> |
| CV_0334                      |             | Conserved hypothetical protein                               | 2.85 | < 10 <sup>-16</sup> |
| CV_0336                      |             | Conserved hypothetical protein                               | 2.74 | < 10 <sup>-16</sup> |
| CV_0521                      |             | Probable membrane protein                                    | 8.16 | < 10 <sup>-16</sup> |
| CV_0758                      |             | Hypothetical protein                                         | 4.32 | < 10 <sup>-16</sup> |
| CV_1004                      |             | Hypothetical protein                                         | 2.57 | < 10 <sup>-16</sup> |
| CV_1142                      |             | Hypothetical protein                                         | 3.09 | < 10 <sup>-16</sup> |
| CV_1727                      |             | Conserved hypothetical protein                               | 4.58 | < 10 <sup>-16</sup> |
| CV_1833                      |             | Conserved hypothetical protein                               | 2.43 | < 10 <sup>-16</sup> |
| CV_1903                      |             | Conserved hypothetical protein                               | 3.50 | < 10 <sup>-16</sup> |
| CV_2002                      |             | Hypothetical protein                                         | 4.94 | < 10 <sup>-16</sup> |

|         |                                |      |                     |
|---------|--------------------------------|------|---------------------|
| CV_2189 | Conserved hypothetical protein | 4.07 | < 10 <sup>-16</sup> |
| CV_2383 | Hypothetical protein           | 3.32 | < 10 <sup>-16</sup> |
| CV_2448 | Conserved hypothetical protein | 3.86 | < 10 <sup>-16</sup> |
| CV_2450 | Hypothetical protein           | 6.80 | < 10 <sup>-16</sup> |
| CV_2531 | Probable transmembrane protein | 6.26 | < 10 <sup>-16</sup> |
| CV_2695 | Hypothetical protein           | 6.79 | < 10 <sup>-16</sup> |
| CV_2696 | Conserved hypothetical protein | 6.21 | < 10 <sup>-16</sup> |
| CV_3155 | Conserved hypothetical protein | 2.75 | < 10 <sup>-16</sup> |
| CV_3191 | Conserved hypothetical protein | 2.77 | < 10 <sup>-16</sup> |
| CV_3662 | Hypothetical protein           | 3.16 | < 10 <sup>-16</sup> |
| CV_3867 | Hypothetical protein           | 7.90 | < 10 <sup>-16</sup> |
| CV_3868 | Conserved hypothetical protein | 7.93 | < 10 <sup>-16</sup> |
| CV_4085 | Conserved hypothetical protein | 2.89 | < 10 <sup>-16</sup> |
| CV_4086 | Conserved hypothetical protein | 2.68 | < 10 <sup>-16</sup> |
| CV_4322 | Conserved hypothetical protein | 2.86 | < 10 <sup>-16</sup> |
| CV_4323 | Conserved hypothetical protein | 2.96 | < 10 <sup>-16</sup> |

\*Genes shared between our both microarrays

**Table S3** List of genes shared among our microarray analyses and the CHP stimulon

| WTCHP/WT   | $\Delta osbR$ /WT | $\Delta osbR$ (pJN105)/WT( <i>osbR</i> ) | Gene                           | Function                                                    |
|------------|-------------------|------------------------------------------|--------------------------------|-------------------------------------------------------------|
| 67196_3489 |                   | 67196_3489                               |                                | Hypothetical protein                                        |
| CV_0636    | CV_0636           |                                          |                                | Hypothetical protein                                        |
| CV_0993    | CV_0993           |                                          |                                | MFS transporter, AAHS family, 4-hydroxybenzoate transporter |
| CV_0118    |                   | CV_0118                                  | <i>gltK</i>                    | Glutamate/aspartate transport system permease protein       |
| CV_0190    |                   | CV_0190                                  |                                | Glyceraldehyde 3-phosphate dehydrogenase                    |
| CV_0209    |                   | CV_0209                                  | <i>ohrA</i>                    |                                                             |
| CV_0210    |                   | CV_0210                                  | <i>ohrR</i>                    |                                                             |
| CV_0398    |                   | CV_0398                                  | <i>exbD2</i>                   | Biopolymer transport protein                                |
| CV_0399    |                   | CV_0399                                  | <i>exbB</i>                    | Biopolymer transport protein ExbB                           |
| CV_0400    |                   | CV_0400                                  |                                | Periplasmic protein TonB                                    |
| CV_1105    |                   | CV_1105                                  | <i>gltS</i>                    | Sodium/glutamate symport carrier protein                    |
| CV_1137    |                   | CV_1137                                  | <i>adhE</i>                    | Acetaldehyde dehydrogenase                                  |
| CV_1174    |                   | CV_1174                                  |                                | Cytochrome-c oxidase, subunit I                             |
| CV_1481    |                   | CV_1481                                  | <i>aroF</i>                    | 2-dehydro-3-deoxy-phosphoheptonate aldolase                 |
| CV_1482    |                   | CV_1482                                  | <i>cbaA</i><br>( <i>entA</i> ) | 2,3-dihydro-2,3-dihydroxybenzoate dehydrogenase             |
| CV_1483    |                   | CV_1483                                  | <i>cbaB</i><br>( <i>entB</i> ) | Isochorismatase                                             |

|         |         |         |                                |                                                           |
|---------|---------|---------|--------------------------------|-----------------------------------------------------------|
| CV_1484 |         | CV_1484 | <i>cbaE</i><br>( <i>entE</i> ) | 2,3-dihydroxybenzoate-AMP ligase                          |
| CV_1485 |         | CV_1485 | <i>cbaC</i><br>( <i>entC</i> ) | Isochorismate synthase EntC / MenF                        |
| CV_1486 |         | CV_1486 | <i>cbaF</i><br>( <i>entF</i> ) | Enterobactin synthetase component F                       |
| CV_1934 |         | CV_1934 | <i>metY</i>                    | O-acetylhomoserine (thiol)-lyase                          |
| CV_2446 |         | CV_2446 |                                | 3-oxoacyl-[acyl-carrier-protein] synthase III             |
| CV_2449 |         | CV_2449 |                                | Coenzyme F390 synthetase                                  |
| CV_2540 | CV_2540 | CV_2540 | <i>narI</i>                    | Nitrate reductase                                         |
| CV_2541 | CV_2541 | CV_2541 | <i>narJ</i>                    | Nitrate reductase molybdenum cofactor assembly chaperone  |
| CV_2542 | CV_2542 | CV_2542 | <i>narH</i>                    | Nitrate reductase / nitrite oxidoreductase, beta subunit  |
| CV_2543 | CV_2543 | CV_2543 | <i>narG</i>                    | Nitrate reductase / nitrite oxidoreductase, alpha subunit |
| CV_2695 |         | CV_2695 |                                | Hypothetical protein                                      |
| CV_2696 |         | CV_2696 |                                | Hypothetical protein                                      |
| CV_2970 |         | CV_2970 |                                | Hypothetical protein                                      |
| CV_3298 |         | CV_3298 | <i>lamB</i>                    | Maltoporin precursor                                      |
| CV_3566 |         | CV_3566 |                                | Hypothetical protein                                      |
| CV_4002 |         | CV_4002 | <i>glnK</i>                    | Nitrogen regulatory protein P-II-2                        |
| CV_4003 |         | CV_4003 | <i>amtB</i>                    | Ammonium transporter                                      |
| CV_4084 |         | CV_4084 |                                | Probable protease                                         |

CHP results from a previous work [30]. Blue and orange colors indicate genes activated or repressed by OsbR, respectively.
